# Supplementary material for: Impaired fast-spiking interneuron function in a genetic mouse model of depression
Source: eLife journal article supplement (doi:10.7554/elife.04979), 2015-03-03
Supplement: supp [file elife_poa_e04979_Figure_3_figure_supplement_1.pdf › elife_poa_e04979_Figure_3_figure_supplement_1.pdf]

**a**

Disc1

control

- layer 1

layer 2/3

- layer 5

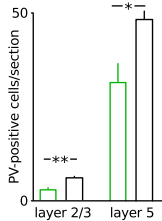

ayer 2/3

layer 5

b

hippocampus

pc

pc

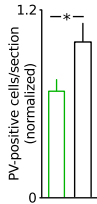

(normalized)

C

ventro-orbital cortex

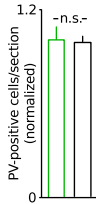

(normalized)

—do—
