# Supplementary figures and images for: Impaired fast-spiking interneuron function in a genetic mouse model of depression
Source: eLife journal article supplement (doi:10.7554/elife.04979), 2015-03-03

**a**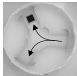

sample run

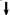

30 s

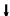

match run

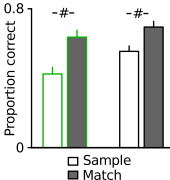**b**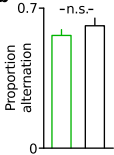

Supplement: supp [file elife_poa_e04979_Figure_1_figure_supplement_1.pdf › elife_poa_e04979_Figure_1_figure_supplement_1.pdf]

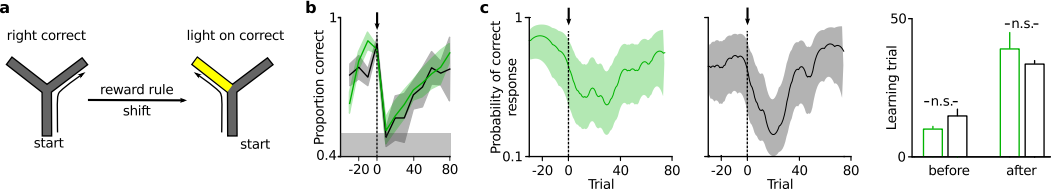

Supplement: supp [file elife_poa_e04979_Figure_1_figure_supplement_2.pdf › elife_poa_e04979_Figure_1_figure_supplement_2.pdf]

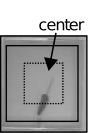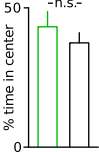

Supplement: supp [file elife_poa_e04979_Figure_1_figure_supplement_3.pdf › elife_poa_e04979_Figure_1_figure_supplement_3.pdf]

**a**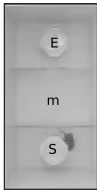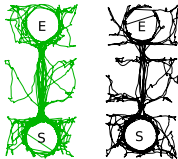**b**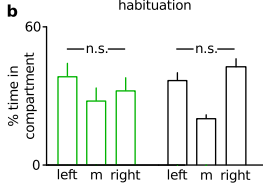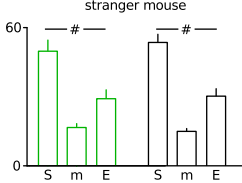

Supplement: supp [file elife_poa_e04979_Figure_1_figure_supplement_4.pdf › elife_poa_e04979_Figure_1_figure_supplement_4.pdf]

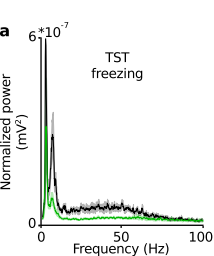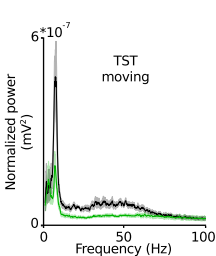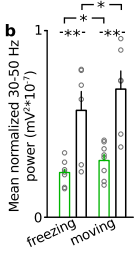

Supplement: supp [file elife_poa_e04979_Figure_2_figure_supplement_1.pdf › elife_poa_e04979_Figure_2_figure_supplement_1.pdf]

**a**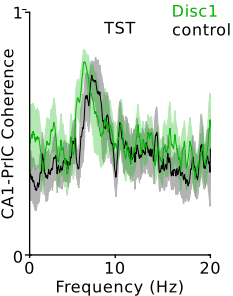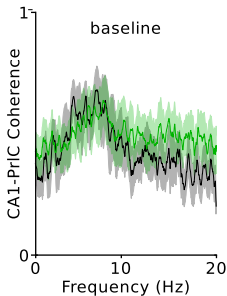**b**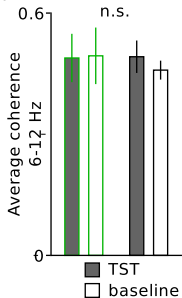

Supplement: supp [file elife_poa_e04979_Figure_2_figure_supplement_2.pdf › elife_poa_e04979_Figure_2_figure_supplement_2.pdf]

Disc1

DAPI

PV

Disc1

merge

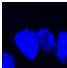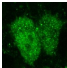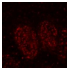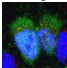

control

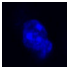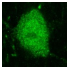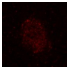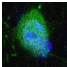

Supplement: supp [file elife_poa_e04979_Figure_3_figure_supplement_2.pdf › elife_poa_e04979_Figure_3_figure_supplement_2.pdf]

**a**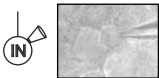**b**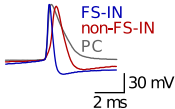**c**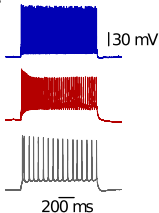

non-FS FS

**d**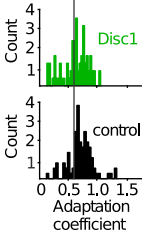

Supplement: supp [file elife_poa_e04979_Figure_3_figure_supplement_3.pdf › elife_poa_e04979_Figure_3_figure_supplement_3.pdf]

**a** Disc1

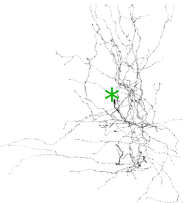

control

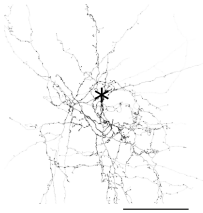

**b**

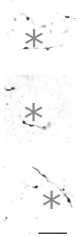

**c**

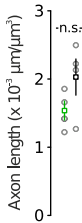

Supplement: supp [file elife_poa_e04979_Figure_3_figure_supplement_4.pdf › elife_poa_e04979_Figure_3_figure_supplement_4.pdf]

**a**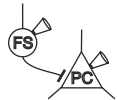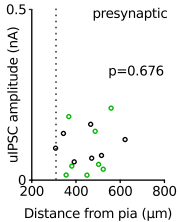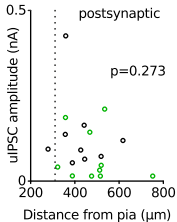**b**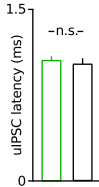**c**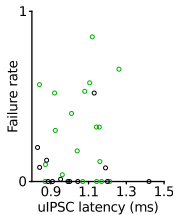

Supplement: supp [file elife_poa_e04979_Figure_4_figure_supplement_1.pdf › elife_poa_e04979_Figure_4_figure_supplement_1.pdf]

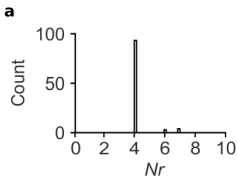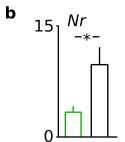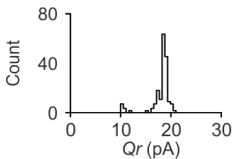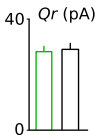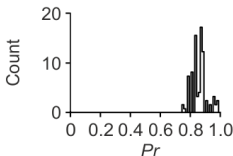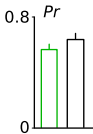

Supplement: supp [file elife_poa_e04979_Figure_4_figure_supplement_2.pdf › elife_poa_e04979_Figure_4_figure_supplement_2.pdf]

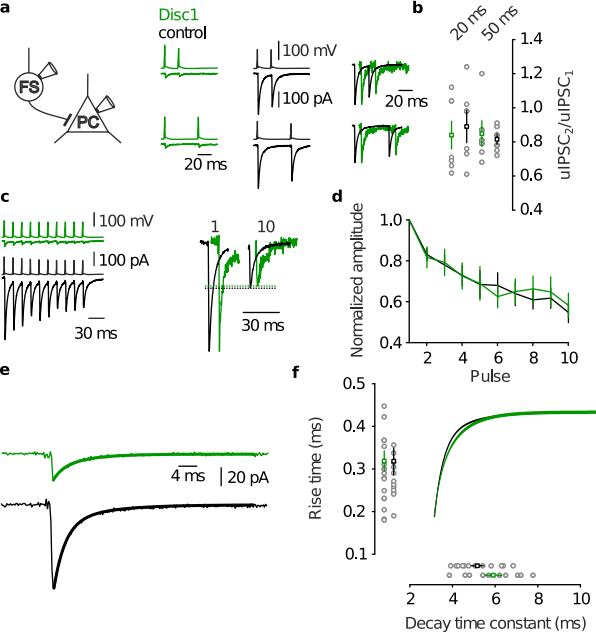

Supplement: supp [file elife_poa_e04979_Figure_4_figure_supplement_3.pdf › elife_poa_e04979_Figure_4_figure_supplement_3.pdf]

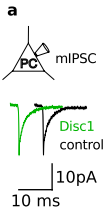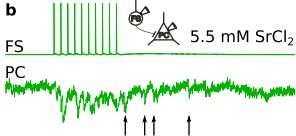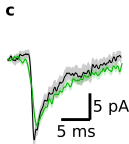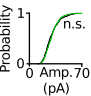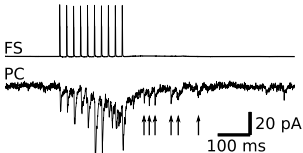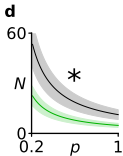

Supplement: supp [file elife_poa_e04979_Figure_4_figure_supplement_4.pdf › elife_poa_e04979_Figure_4_figure_supplement_4.pdf]

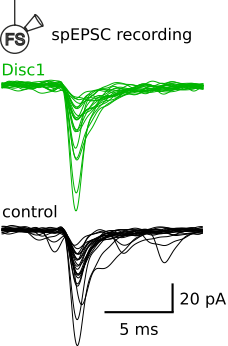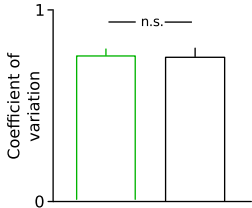

Supplement: supp [file elife_poa_e04979_Figure_4_figure_supplement_5.pdf › elife_poa_e04979_Figure_4_figure_supplement_5.pdf]

**a****LFP**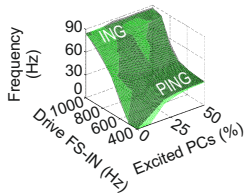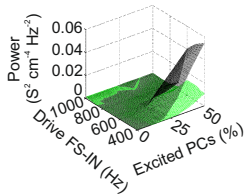**Firing rate**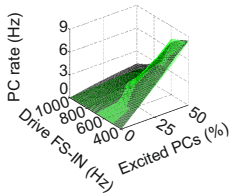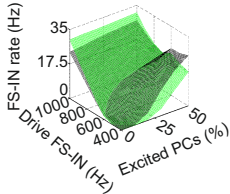**b****Time lag**

PC spikes

IN rate

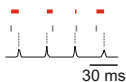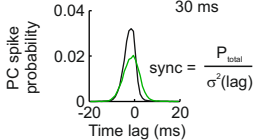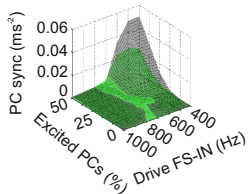

Supplement: supp [file elife_poa_e04979_Figure_5_figure_supplement_1.pdf › elife_poa_e04979_Figure_5_figure_supplement_1.pdf]
